# Supplementary material
Source: PubMed Central journal article supplement (PMC8357287)
Supplement: aem.00602-21-s0001.pdf [file aem.00602-21-s0001.pdf]

## Supplementary Materials

### Identification of reductive dehalogenases that mediate complete debromination of penta- and tetra-brominated diphenyl ethers in

#### *Dehalococcoides*

Siyao Zhao,<sup>a</sup> Matthew J. Rogers,<sup>a</sup> Lifeng Cao,<sup>a</sup> Chang Ding,<sup>b</sup> Jianzhong He<sup>a\*</sup>

<sup>a</sup>Department of Civil and Environmental Engineering, National University of Singapore, Singapore

<sup>b</sup>Helmholtz Centre for Environmental Research – UFZ, Department of Environmental Biotechnology, Permoserstraße 15, 04318 Leipzig, Germany

\* Corresponding author:

Department of Civil and Environmental Engineering

National University of Singapore

Block E2-02-13

1 Engineering Drive 3, Singapore 117576

Phone: (65) 6516-3385; Fax: (65) 6779-1635

Email: [jianzhong.he@nus.edu.sg](mailto:jianzhong.he@nus.edu.sg)

## Supplementary Figures

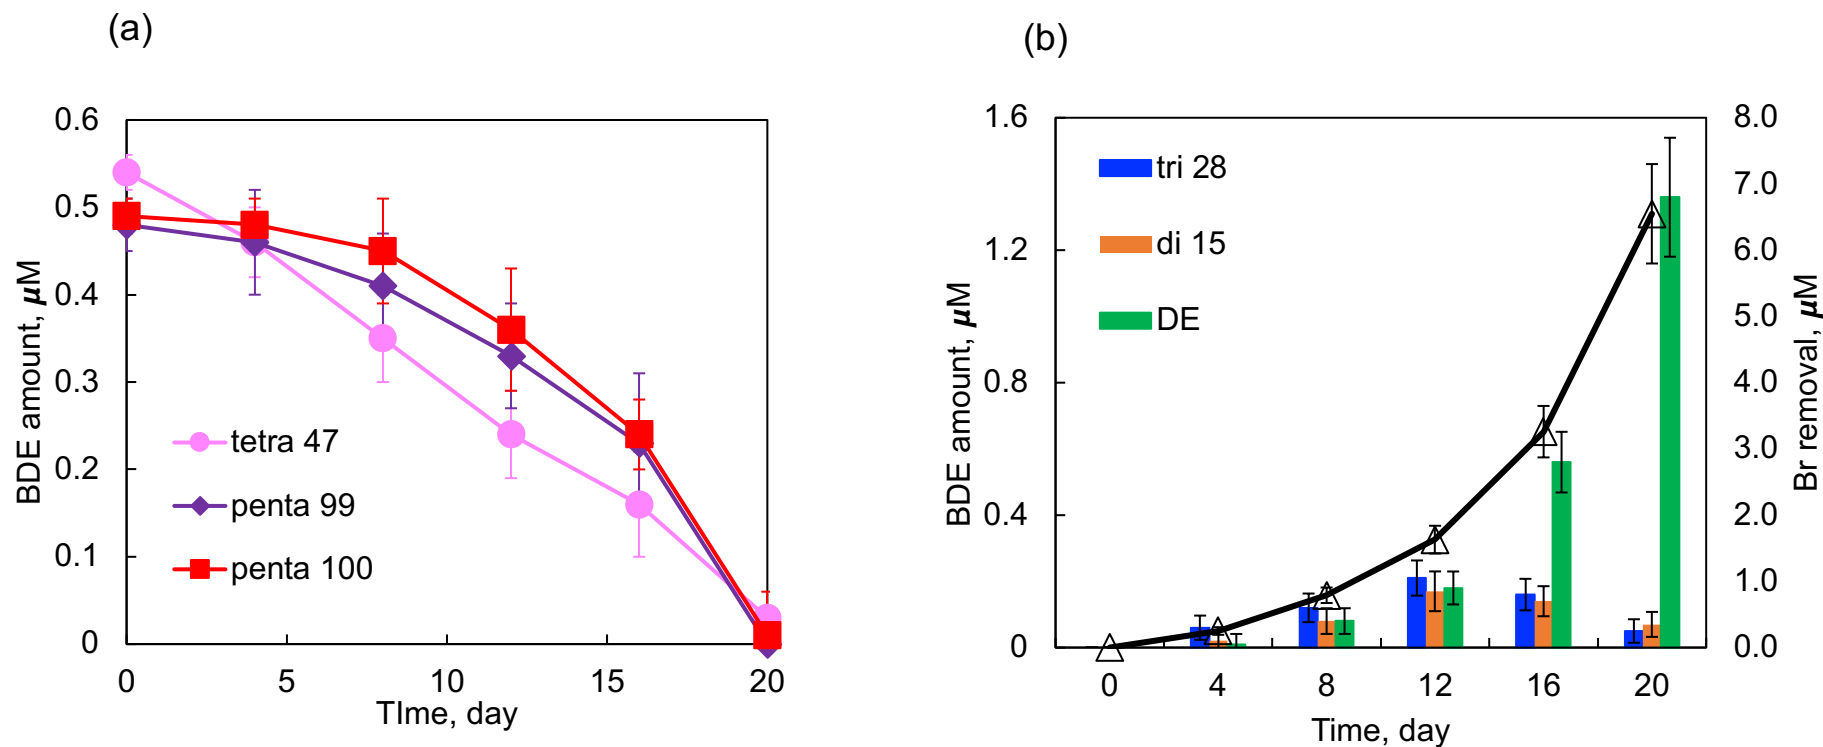

**Figure S1.** Sediment-free culture TZ50 debrominated a) parent and b) daughter compounds from the penta- and tetra-BDE mixture to produce diphenyl ether. DE, diphenyl ether. Bromine removal was estimated from measured amounts of PBDE congeners.

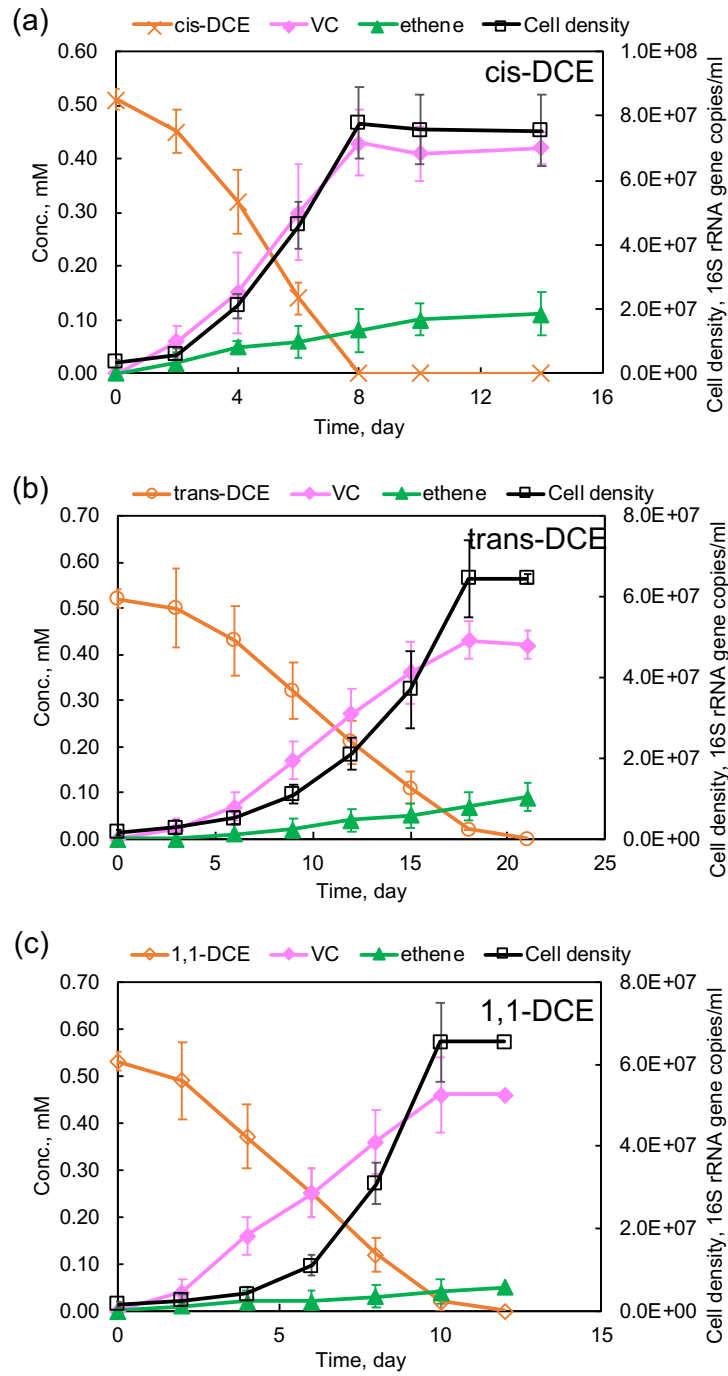

**Figure S2.** Dechlorination of a) *cis*-DCE, b) *trans*-DCE, and c) 1,1-DCE by the TZ50 enrichment culture. VC, vinyl chloride; DCE, dichloroethene.

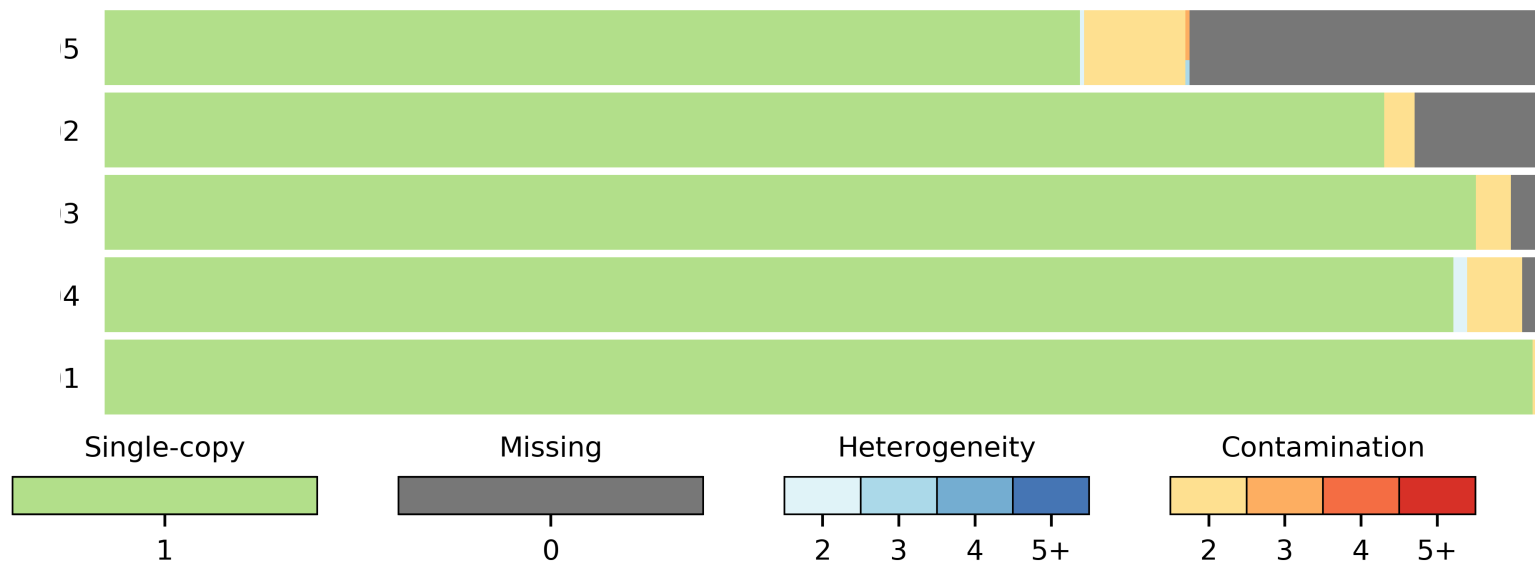

**Figure S3.** CheckM evaluation of binned metagenomic reads derived from the TZ50 enrichment culture. Kraken2 identified reads comprising bin 1 were as *Dehalococcoides*.

(a)

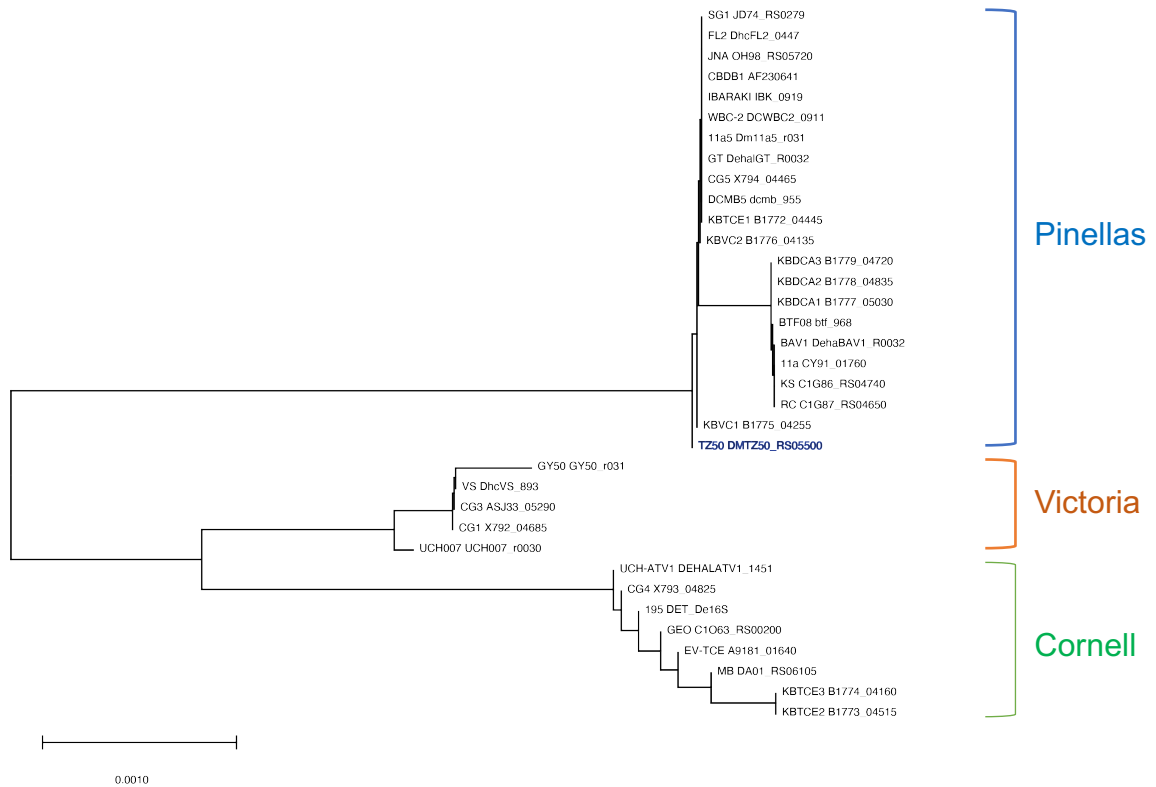

(b)

|          | TZ50    | 11a5  | BTF08 | CG5   | WBC-2 | DCMB5 | BAV1  | Ibaraki | KBDCA1 | KBTCE1 | CG1   | GY50  | VS    | 195   | CG4  |
|----------|---------|-------|-------|-------|-------|-------|-------|---------|--------|--------|-------|-------|-------|-------|------|
| Pinellas | TZ50    | *     |       |       |       |       |       |         |        |        |       |       |       |       |      |
|          | 11a5    | 99.59 | *     |       |       |       |       |         |        |        |       |       |       |       |      |
|          | BTF08   | 99.04 | 99.06 | *     |       |       |       |         |        |        |       |       |       |       |      |
|          | CG5     | 99.76 | 99.75 | 99.06 | *     |       |       |         |        |        |       |       |       |       |      |
|          | WBC-2   | 99.56 | 99.57 | 98.82 | 99.57 | *     |       |         |        |        |       |       |       |       |      |
|          | DCMB5   | 99.18 | 99.24 | 99.07 | 99.25 | 99.07 | *     |         |        |        |       |       |       |       |      |
|          | BAV1    | 98.96 | 98.98 | 99.12 | 99.07 | 98.83 | 99    | *       |        |        |       |       |       |       |      |
|          | Ibaraki | 99.24 | 99.35 | 99.15 | 99.34 | 98.99 | 99.65 | 98.98   | *      |        |       |       |       |       |      |
|          | KBDCA1  | 99.25 | 99.22 | 99.23 | 99.3  | 98.83 | 99.34 | 99      | 99.26  | *      |       |       |       |       |      |
| Victoria | KBTCE1  | 99.11 | 99.13 | 99.02 | 99.18 | 99.04 | 99.32 | 98.99   | 99.39  | 99.37  | *     |       |       |       |      |
|          | CG1     | 87.19 | 87.47 | 87.25 | 87.2  | 87.51 | 87.22 | 87.18   | 87.25  | 87.14  | 87.21 | *     |       |       |      |
|          | GY50    | 87.28 | 87.42 | 87.21 | 87.12 | 87.44 | 87.22 | 87.19   | 87.18  | 87.14  | 87.09 | 99.25 | *     |       |      |
|          | VS      | 87.26 | 87.37 | 87.45 | 87.08 | 87.5  | 87.12 | 87.16   | 87.24  | 87.11  | 87.27 | 97.66 | 97.87 | *     |      |
| Cornell  | 195     | 86.98 | 87.13 | 87.24 | 87.11 | 87.11 | 86.98 | 86.98   | 86.9   | 87.14  | 86.95 | 90.44 | 90.44 | 90.37 | *    |
|          | CG4     | 86.7  | 86.76 | 86.78 | 86.87 | 86.87 | 86.69 | 86.73   | 86.72  | 86.69  | 86.68 | 90.64 | 90.63 | 90.55 | 98.1 |

**Figure S4.** Phylogeny of the *Dehalococcoides* population in the TZ50 enrichment culture was inferred using a) a neighbor-joining phylogenetic tree of 16S rRNA gene sequences and b) ANIm genome comparison.

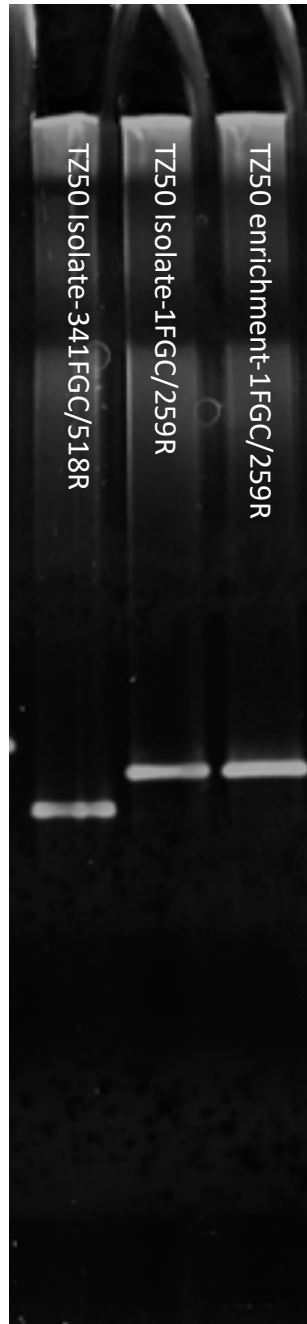

**Figure S5.** DGGE analysis of TZ50 enrichment culture and isolate. Lane 1: Strain TZ50 DNA amplified with universal bacterial primer pair 341FGC/518R; Lane 2: Strain TZ50 DNA amplified with *Dehalococcoides* specific primer pair 1FGC/259R; Lane 3: TZ50 enrichment culture DNA amplified with *Dehalococcoides* specific primer pair 1FGC/259R.

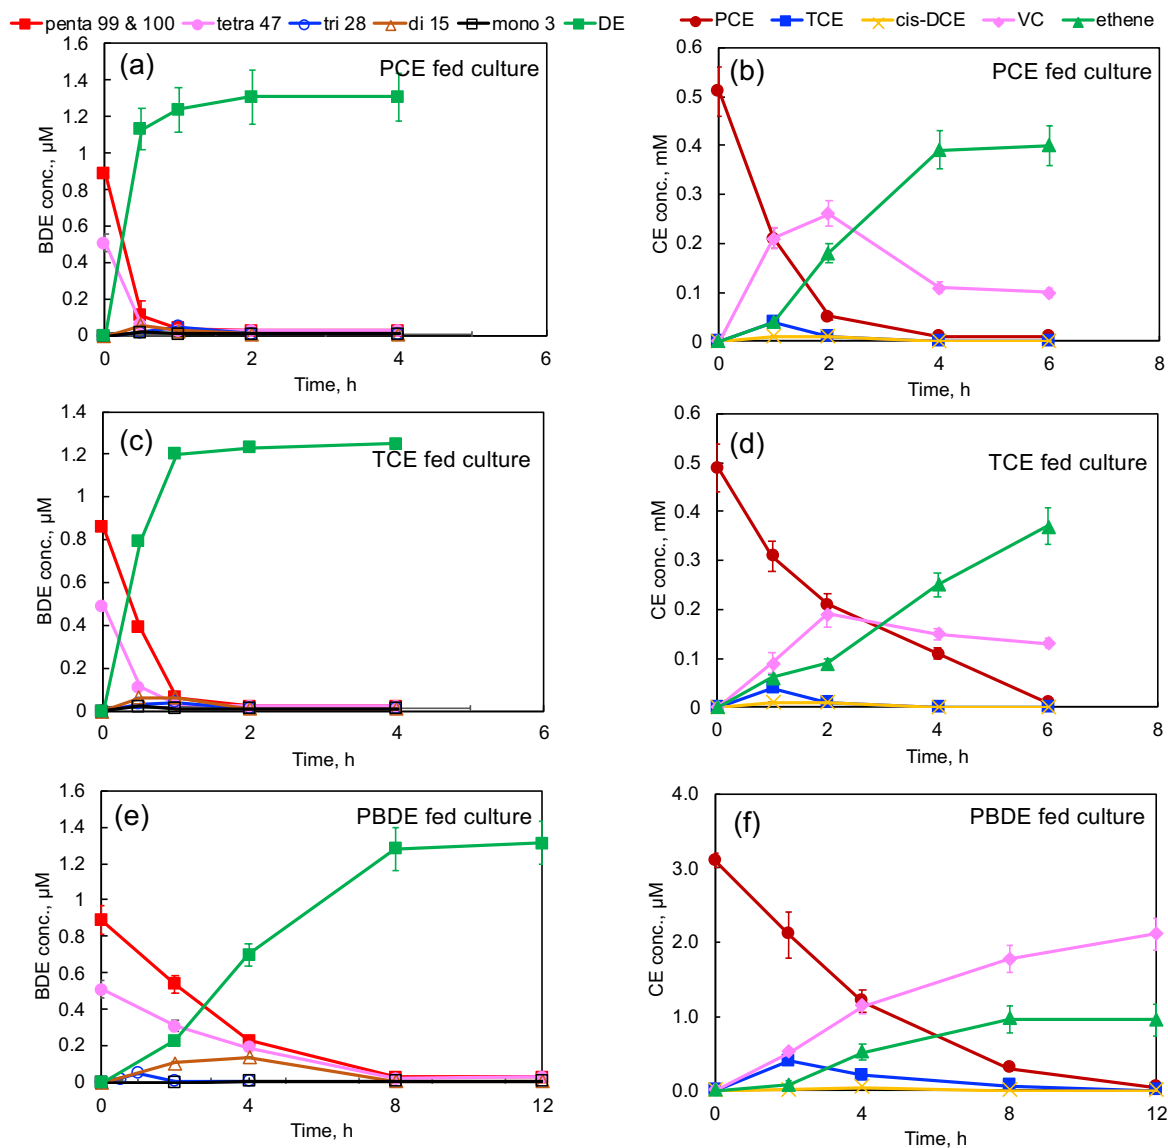

**Figure S6.** Enzymatic *in vitro* assays of crude cell extracts of *D. mccartyi* strain TZ50 cultivated with PCE (0.6 mM), TCE (0.6 mM), or the penta- and tetra-BDE mixture (1.5 µM). Panels a, b, and c show *in vitro* dehalogenation of the penta- and tetra-BDE mixture by cells extracted from cultures amended with PCE, TCE and the penta- and tetra-BDE mixture, respectively. Panels b, d, and f show *in vitro* dehalogenation of PCE by cells extracted from cultures amended with PCE, TCE and the penta- and tetra-BDE mixture, respectively.

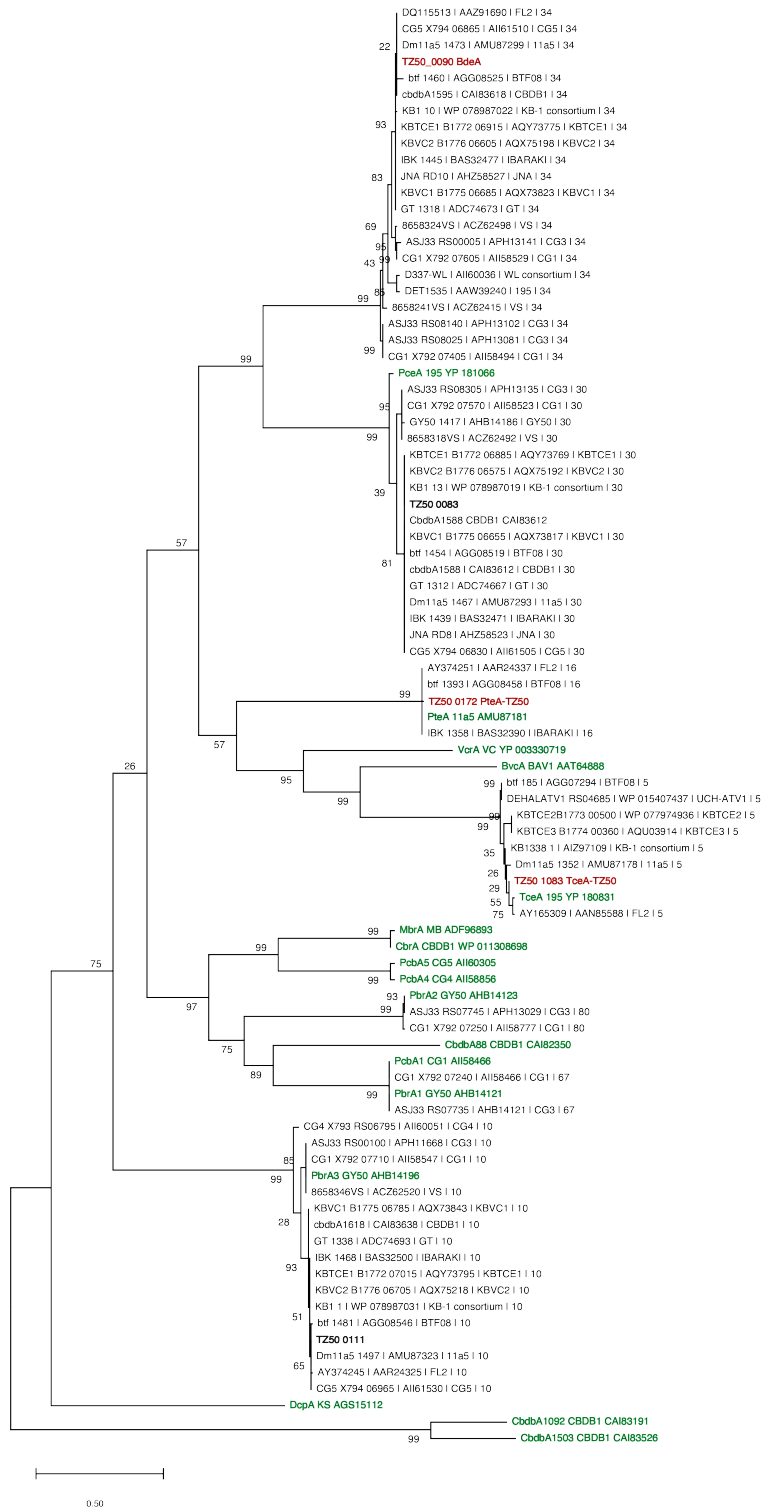

Figure S7. Maximum likelihood dendrogram of identified PBDE reductive dehalogenases (RDase) in *D. mccartyi* strains TZ50 and GY50, as well as associated orthologous and functionally characterized RDases in other *D. mccartyi*. The final tree is supported by 1,000 bootstrap replicates. Where the information is available, locus tag, NCBI accession number, and source of amino acid sequences included in the analysis are indicated next to the leaves on the dendrogram. Green font indicates functionally characterized RDases in other *D. mccartyi*; red font indicates PBDE RDases in strain TZ50, black font in bold indicates other RdhAs in strain TZ50.



**Tables.****Table S1.** Genomic features of *D. mccartyi* strain TZ50

---

| Genome features                    |                           |
|------------------------------------|---------------------------|
| # of Contigs (>1 kb)               | 8                         |
| # of Scaffolds                     | 6                         |
| Size                               | 1.41 Mbp (N50 = 0.81 Mbp) |
| GC content                         | 47.1%                     |
| Averaged coverage                  | 1451.3                    |
| # of predicted open reading frames | 1,526                     |
| # of 16S rRNA genes                | 1                         |
| # of tmRNA genes                   | 1                         |
| # of tRNA genes                    | 46                        |

---

**Table S2.** Orthologous group (OG) classification of RdhA in *D. mccartyi* strain TZ50.

| RdhAs ID  | OG  | Functional members of OG |
|-----------|-----|--------------------------|
| TZ50_0034 | 73  |                          |
| TZ50_0037 | 72  |                          |
| TZ50_0040 | NA  |                          |
| TZ50_0043 | 51  |                          |
| TZ50_0046 | NA  |                          |
| TZ50_0055 | 14  |                          |
| TZ50_0066 | 33  |                          |
| TZ50_0070 | 32  |                          |
| TZ50_0073 | 19  |                          |
| TZ50_0077 | 40  |                          |
| TZ50_0083 | 30  | PceA                     |
| TZ50_0090 | 34  | BdeA                     |
| TZ50_0093 | 11  |                          |
| TZ50_0111 | 10  | PbrA3                    |
| TZ50_0117 | 17  |                          |
| TZ50_0120 | 13  |                          |
| TZ50_0127 | 15  |                          |
| TZ50_0172 | 16  | PteA                     |
| TZ50_0391 | 23  |                          |
| TZ50_0430 | 22  |                          |
| TZ50_0436 | 29  |                          |
| TZ50_1083 | 5   | TceA                     |
| TZ50_1230 | 341 |                          |
| TZ50_1526 | 17  |                          |
| TZ50_1528 | 12  |                          |

**Table S3:** Microcosms established in this study.

| Location                    | Source                     | GPS                 | Collection date | Designation |
|-----------------------------|----------------------------|---------------------|-----------------|-------------|
| Taizhou, Zhejiang, China    | e-waste recycling site     | 121.38251, 28.54067 | 12-11-2016      | TZ1         |
| Taizhou, Zhejiang, China    | e-waste recycling site     | 121.37524, 28.54084 | 12-11-2016      | TZ2         |
| Taizhou, Zhejiang, China    | e-waste recycling site     | 121.36764, 28.53859 | 12-11-2016      | TZ3         |
| Taizhou, Zhejiang, China    | e-waste recycling site     | 121.38800, 28.54472 | 12-11-2016      | TZ4         |
| Taizhou, Zhejiang, China    | e-waste recycling site     | 121.39279, 28.55529 | 12-11-2016      | TZ5         |
| Taizhou, Zhejiang, China    | e-waste recycling site     | 121.39590, 28.59311 | 12-11-2016      | TZ6         |
| Taizhou, Zhejiang, China    | e-waste recycling site     | 121.39573, 28.60287 | 12-11-2016      | TZ7         |
| Taizhou, Zhejiang, China    | e-waste recycling site     | 121.39583, 28.59301 | 12-11-2016      | TZ8         |
| Singapore                   | wastewater treatment plant | 1.42852, 103.75814  | 05-03-2018      | WWTP-N      |
| Singapore                   | wastewater treatment plant | 1.31197, 103.68323  | 20-06-2018      | WWTP-W      |
| Singapore                   | wastewater treatment plant | 1.31647, 104.00443  | 13-04-2018      | WWTP-E      |
| Singapore                   | wastewater treatment plant | 1.33268, 103.75542  | 06-03-2018      | WWTP-U      |
| Singapore                   | constructed wetlands       | 1.39572, 103.92418  | 28-02-2018      | LH-1        |
| Singapore                   | constructed wetlands       | 1.39492, 103.92310  | 28-02-2018      | LH-2        |
| Singapore                   | constructed wetlands       | 1.39532, 103.92333  | 28-02-2018      | LH-3        |
| Singapore                   | constructed wetlands       | 1.39584, 103.92305  | 28-02-2018      | LH-4        |
| Singapore                   | constructed wetlands       | 1.39441, 103.92344  | 28-02-2018      | LH-5        |
| Singapore                   | constructed wetlands       | 1.39433, 103.92397  | 28-02-2018      | LH-6        |
| Zhanjiang, Guangdong, China | industrial sediments       | 21.20910, 110.42186 | 24-10-2016      | ZJ-1        |
| Zhanjiang, Guangdong, China | industrial sediments       | 21.20894, 110.42177 | 24-10-2016      | ZJ-2        |
| Singapore                   | lake sediments             | 1.35161, 103.81882  | 01-03-2018      | MR-1        |
| Singapore                   | lake sediments             | 1.34835, 103.81427  | 01-03-2018      | MR-2        |
| Singapore                   | lake sediments             | 1.39140, 103.72086  | 11-06-2018      | MR-3        |
| Singapore                   | lake sediments             | 1.41693, 103.71973  | 11-06-2018      | MR-4        |
